# Supplementary material
Source: Research Square preprint supplement (doi:10.21203/rs.3.rs-10148333/v1)
Supplement: Supplementary file 1 [file 81f6ca65c888b92693150ba0.docx]

**Table 1. Summary of Clinical Features. T**otal 21, females 10 (48%), GDD 21, mild 18 (86%), motor delay 10 (48%), speech 6 (29%), behavioural 13 (62%), hypotonia 13 (62%), seizures 9 (43%), hand and feet 9 (43%), hyperlaxity 4 (19%), craniofacial 14 (67%)

**
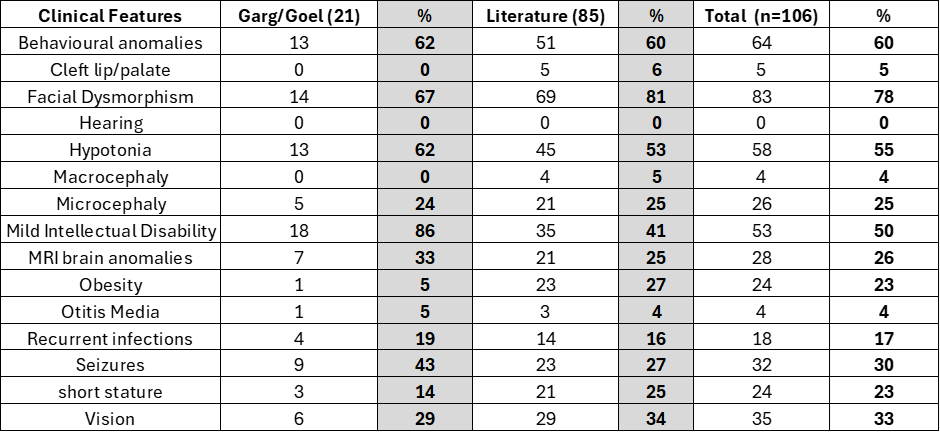
Table 2. Summary of clinical features in our cohort compared with all previously reported cases in the literature, including cumulative frequencies across both groups**

**Table 3. Proposed Clinical Diagnostic Criteria for individuals suspected of having a *FBXO11-* related disorder**

**Table 4. Proposed scoring range and corresponding interpretation of each** **score**
